# Supplementary material for: Enzymatic synthesis of polysaccharide-based copolymers
Source: Royal Society of Chemistry journal article supplement (doi:10.1039/c8gc01251b), 2018-01-01
Supplement: c8gc01251b1.pdf [file c8gc01251b1.pdf]

## Electronic Supplementary Information

### Enzymatic synthesis of polysaccharide-based copolymers

F.Grimaud<sup>a</sup>, P. Faucard<sup>b</sup>, L. Tarquis<sup>a</sup>, S. Pizzut-Serin<sup>a</sup>, P. Roblin<sup>c</sup>, S. Morel<sup>a</sup>, S. Le Gall<sup>b</sup>, X. Falourd<sup>b</sup>, A. Rolland-Sabaté<sup>d</sup>, D. Lourdin<sup>b</sup>, C. Moulis<sup>a</sup>, M. Remaud-Siméon<sup>a</sup> and G. Potocki-Veronese<sup>a†</sup>

---

<sup>a</sup> LISBP, CNRS, INRA, INSAT, Université de Toulouse, F-31400 Toulouse, France.

<sup>b</sup> UR1268 Biopolymères Interactions Assemblages, INRA, F-44300 Nantes, France.

<sup>c</sup> Université de Toulouse, LGC UMR 5503 (CNRS/UPS/INPT), 118 route de Narbonne 31062 Toulouse, France.

<sup>d</sup> UMR408 Sécurité et Qualité des Produits d'Origine Végétale, INRA, Université Avignon, F-84000 Avignon, France ;

†Corresponding author: email: veronese@insa-toulouse.fr; fax: +33 (0)561 559 400.

**The copolymer production yields, including the synthesis and purification steps, were determined as follows:**

- (1) The mass (g) of glucosyl moieties incorporated ( $m_{GLUinc}$ ) from sucrose into the copolymer was determined as follows :

$$m_{GLUinc} = \frac{m_{Sucrose}}{342} \times 162$$

- (2) The theoretical mass (g) of copolymer ( $m_{COP0theor}$ ) produced if all the glucosyl moieties from sucrose are incorporated into copolymer was calculated as follows:

$$m_{COP0theor} = m_{GLUinc} + m_{acceptor}$$

- (3) The copolymer production yield was determined as follows :

$$yield (\%) = \frac{m_{COP0}}{m_{COP0theor}} \times 100$$

with  $m_{COP0}$  corresponding to the mass of copolymer obtained after synthesis, purification and drying.

Table SI: final copolymer production yields, including both the synthesis and purification steps.

| <b>Alternan-<i>b</i>-amylose</b>     |             |
|--------------------------------------|-------------|
| Reaction volume (mL)                 | 113         |
| Enzyme                               | ASR         |
| Units number                         | 113         |
| $m_{\text{sucrose}}$ (g)             | 11.3        |
| $m_{\text{acceptor}}$ (g) → amylose  | 1.89        |
| $m_{\text{COP}O_{\text{theor}}}$ (g) | 7.24        |
| $m_{\text{COP}O}$ (g)                | 0.85        |
| <b>Yield (%)</b>                     | <b>11.7</b> |

  

| <b>Dextran-<i>b</i>-alternan-<i>b</i>-amylose</b>       |             |
|---------------------------------------------------------|-------------|
| Reaction volume (mL)                                    | 1           |
| Enzyme                                                  | DSR-M       |
| Units number                                            | 1           |
| $m_{\text{sucrose}}$ (g)                                | 0.1         |
| $m_{\text{acceptor}}$ (g) → alternan- <i>b</i> -amylose | 0.015       |
| $m_{\text{COP}O_{\text{theor}}}$ (g)                    | 0.062       |
| $m_{\text{COP}O}$ (g)                                   | 0.008       |
| <b>Yield (%)</b>                                        | <b>12.9</b> |

  

| <b>Dextran-<i>b</i>-alternan</b>     |            |
|--------------------------------------|------------|
| Reaction volume (mL)                 | 12         |
| Enzyme                               | DSR-M      |
| Units number                         | 12         |
| $m_{\text{sucrose}}$ (g)             | 1.2        |
| $m_{\text{acceptor}}$ (g) → alternan | 0.18       |
| $m_{\text{COP}O_{\text{theor}}}$ (g) | 0.75       |
| $m_{\text{COP}O}$ (g)                | 0.065      |
| <b>Yield (%)</b>                     | <b>8.7</b> |

The copolymer synthesis yields were estimated as follows, based on the HPAEC-PAD analysis of the reaction media at the initial and final reaction times:

- (1) The estimated mass (g) of copolymer ( $m_{COPO_{estimated}}$ ) was determined as follows:

$$m_{COPO_{estimated}} = \frac{Final\ Area\ copolymer}{Initial\ Area\ acceptor} \times [Acceptor] \times Reaction\ volume$$

The initial and final areas were obtained from the HPAEC-PAD chromatograms of the reaction media at the initial and final reaction times, respectively

- (2) The copolymer synthesis yield was determined as follows :

$$synthesis\ yield\ (\%) = \frac{m_{COPO_{estimated}}}{m_{COPO_{theor}}} \times 100$$

Table SII: copolymer synthesis yields.

| <b>Alternan-<i>b</i>-amylose</b>                  |             |
|---------------------------------------------------|-------------|
| Reaction volume (mL)                              | 113         |
| Enzyme                                            | ASR         |
| Units number                                      | 113         |
| $m_{sucrose}$ (g)                                 | 11.3        |
| $m_{acceptor}$ (g) → amylose                      | 1.69        |
| $m_{COPO_{estimated}}$ (g)                        | 2.59        |
| $m_{COPO_{theor}}$ (g)                            | 7.24        |
| <b>Yield (%)</b>                                  | <b>35.8</b> |
| <b>Dextran-<i>b</i>-alternan-<i>b</i>-amylose</b> |             |
| Reaction volume (mL)                              | 1           |
| Enzyme                                            | DSR-M       |
| Units number                                      | 1           |
| $m_{sucrose}$ (g)                                 | 0.1         |
| $m_{acceptor}$ (g) → alternan- <i>b</i> -amylose  | 0.015       |
| $m_{COPO_{estimated}}$ (g)                        | 0.028       |
| $m_{COPO_{theor}}$ (g)                            | 0.062       |
| <b>Yield (%)</b>                                  | <b>45.2</b> |
| <b>Dextran-<i>b</i>-alternan</b>                  |             |
| Reaction volume (mL)                              | 12          |
| Enzyme                                            | DSR-M       |
| Units number                                      | 12          |
| $m_{sucrose}$ (g)                                 | 1.2         |
| $m_{acceptor}$ (g) → alternan                     | 0.18        |
| $m_{COPO_{estimated}}$ (g)                        | 0.332       |
| $m_{COPO_{theor}}$ (g)                            | 0.75        |

**Yield (%)**

**44.3**

---
